# Supplementary material
Source: PubMed Central journal article supplement (PMC2660624)
Supplement: tpc.108.062596_1.pdf [file tpc.108.062596_1.pdf]

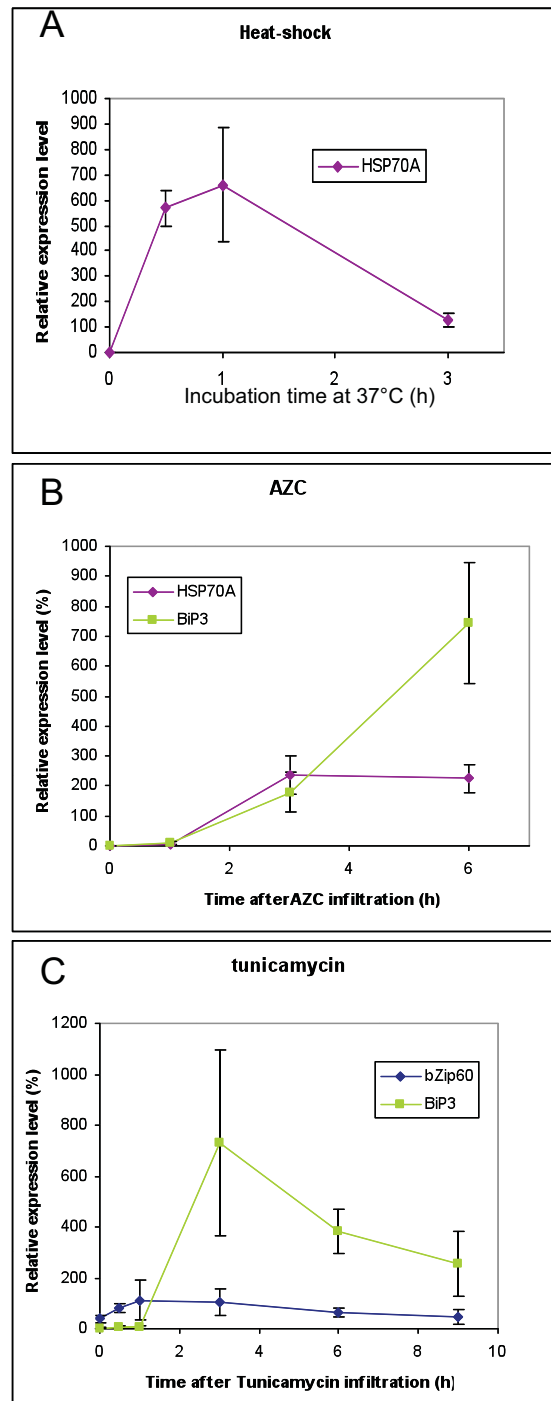

**Supplemental Figure 1. Time course of heat-shock, CPR and UPR marker gene**

(A) Time course of *HSP70A* expression during heat treatment (37°C) determined using qRT-PCR.

(B) Time course of *HSP70A* and *Bip3* expression after the infiltration of AZC.

(C) Time course of  $\beta$ *ZIP60* and *Bip3* expression after the infiltration of tunicamycin.

In each case, relative expression level of *HSP70A* to *EF1 $\alpha$*  is shown. Measurements are the means of three technical and three biological replicates. Bars =  $\pm$ SD

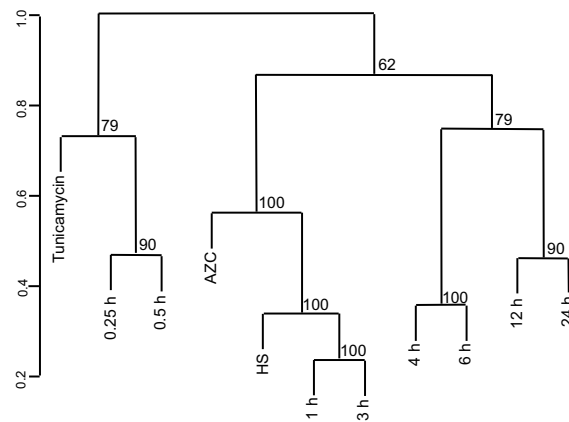

**Supplemental Figure 2. Clustal analysis of public and recoded microarray datasets.**

Public dataset transcript changes for heat-stressed shoots, determined within the AtGeneExpress project (Heat-Stressed samples: Nover et al. Gene Expression Omnibus (GEO) Accession GSE5628; Control: Townsend et al. GEO accession GSE5620) were compared with our microarray data for hHeat-shock (HS), AZC- and Tunicamycin-treated tissues. The analysis of the public dataset was carried out using the same statistical approaches as for our experiments but restricted to shoot samples (32 chips) with the following time points: [0 h = start heat stress] 0.25 h, 0.5 h, 1 h, 3 h, 4 h, 6 h, 12 h, 24 h. The analysis shows a close correlation of our heat-stressed samples with the public data and a clustering of our tunicamycin-treated samples with the earliest responses to heat stress. The left scale bar represents the correlation distance.

**ATG**GAAGAACTGAAAAGTGGAAATGGAGGAAGAAACGG  
TGACGTTTACTGGTTCTGTAGCGGCTTCTTCATCTGT  
AGGATCCTCTTCTCTCCTAGACCAATGGAAGGGCTT  
AACGAAACAGGGCCACCACCGTTTCTGACTAAGACTT  
ACGAAATGGTGGAAAGATCCGGCGACGGACACGGTGGT  
TTCTTGGAGTAATGGTCGTAACAGCTTTGTGGTGTGG  
GATTCTCATAAGTTCTCAACAACCTCCTTCCACGTT  
ACTTCAAGCATAGCAATTTCTCAAGTTTTATTTCGTCA  
GCTCAATACTTATgtaagtacctctttgcttcottat  
atctacttagtcttgtttctgtttttgtttctaattt  
ttaattttggatttcttttagatgggtttcctatgagt  
cttcagctataaaaggttagttctttaagcttttaagt  
ggctaaattgaaattagatgcattgagattttggtca  
tatgttaagagaatcatttaacataaaactctgttcaa  
tcctctgtttctgaagttcaaaatgtgtttggtagta  
aaaacagaatcttggaatgataagtaaggactctgcc  
tcaagttcagtagctgatgaaactgttttggtgatt  
gcagGGATTCAGAAAGATTGATCCAGATAGATGGGAA  
TTTGCAAATGAAGGGTTTTTAGCAGGACAAAAGCATC  
TCTTGAAGAACATCAAAAAGAAGGAGGAACATGGGTTT  
GCAGAAATGTGAATCAGCAAGGATCTGGGATGTCATGT  
GTTGAGGTTGGGCAATACGGTTTTCGACGGGGAGGTTG  
AGAGGTTGAAGAGGGATCATGGTGTGCTTGTAGCTGA  
GGTAGTTAGGTTGAGGCAACAGCAACACAGCTCCAAG  
AGTCAAGTTGCAGCTATGGAGCAACGGTTGCTTGTTA  
CTGAGAAGAGACAGCAGCAGATGATGACGTTCCCTTGC  
CAAGGCGTTGAACAATCCGAACCTTTGTTTCAGCAGTTT  
GCGGTTATGAGTAAAGAGAAGAAGAGTTTGTGTTGGTT  
TGGATGTGGGGAGGAAACGGAGGCTTACTTCTACTCC  
AAGCTTGGGGACTATGGAGGAGAATTTGTTACATGAT  
CAAGAGTTTGATAGAATGAAGGATGATATGGAAATGT  
TGTTTCGCTGCAGCAATCGATGATGAGGCGAATAATTC  
GATGCCTACTAAGGAGGAACAATGTTTGGAGGCTATG  
AATGTGATGATGAGAGATGGTAATTTGGAAGCAGCGT  
TGGATGTGAAAGTGGAAAGATTTGGTTGGTTTCGCCTTT  
GGATTGGGACAGCCAAGATCTACATGACATGGTTGAT  
CAAATGGGTTTTCTTGGTTCGGAACCT**TAA**

**Supplemental Figure 3. Nucleotide sequence of HSFA2-II.**  
The nucleotide sequence of *HSFA2-II* RNA is shown in black.  
Mini-exon is identified in black small capitals. The premature  
stop codon is indicated by an underline. Intron sequences are  
shown in lowercase blue letters.

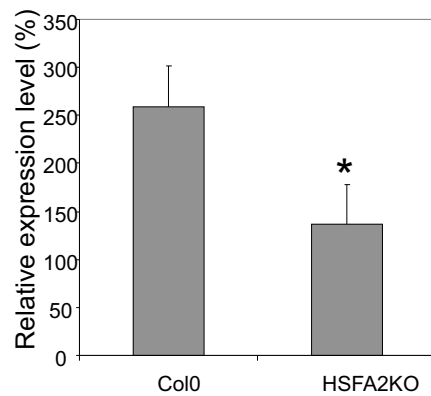

**Supplemental Figure 4. Later *HSP70A* responses in the *hsfa2* knock-out line showing CPR.** Expression analysis (qRT-PCR) for *HSP70A* RNA in the *hsfa2* insertional null (KO) mutant and a wild type (Col-0) control plant, 6 h after treatment with AZC. The data, expressed as values relative to the expression of *EF1a*, are the mean (Bars =  $\pm$  SD) of three biological and three technical replicates. *HSP70A* induction in the *hsfa2* mutant was significantly different from that of Col-0 plant at  $p$  value < 0.05.

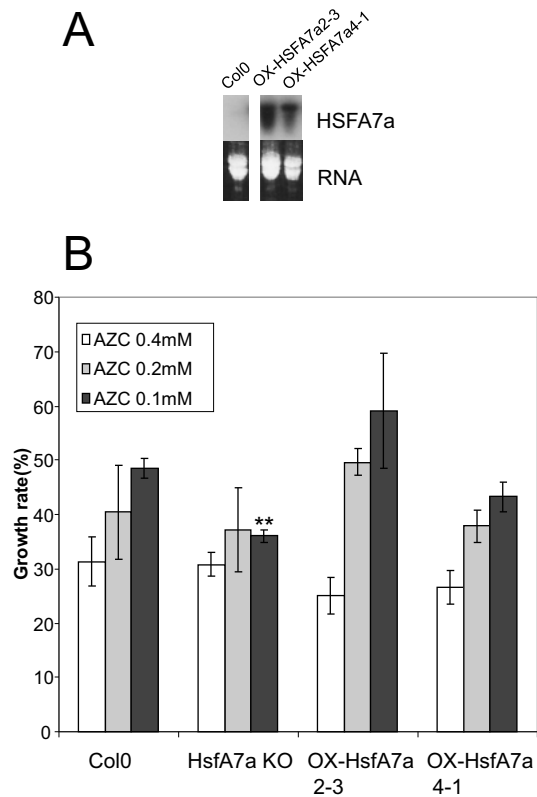

**Supplemental Figure 5. Characterization of *HSFA7a* knock-out and over-expression lines.**

**(A)** Northern blot analysis of *HSFA7a* RNA in the lines over-expressing *pro35S:HSFA7a*.

**(B)** The growth of *Arabidopsis* lines (Col-0 wild type, *HSFA7a* KO mutant, two *HSFA7a* over-expression lines) in the media with the indicated concentration of AZC. The percentage growth was calculated in comparison to the growth of the lines cultured without AZC. The data show the average of three sets of plants. The growth rates of mutant and transgenic lines were compared to Col-0 wild type *Arabidopsis* at each concentration of AZC (student's t-test; p value <0.05) is indicated by asterisks. Two asterisks show significant growth reduction. Only the *hsfa7a* mutant line at the highest AZC concentration showed any significant difference. Bars =  $\pm$  SD

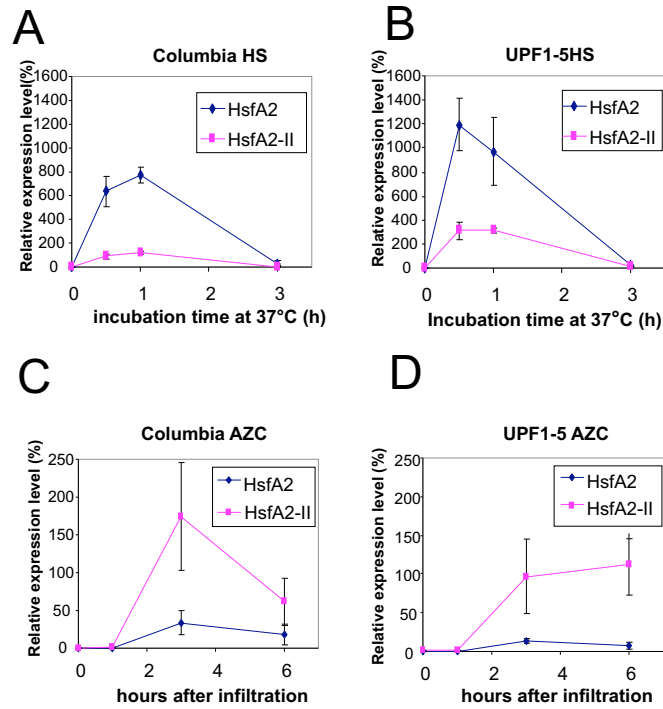

**Supplemental Figure 6. Time course of *HSFA2* and *HSFA2-II* transcript accumulation in wild-type and NMD defective plants.**

(A, B) The time course of the accumulation of *HSFA2-II* to *HSFA2* RNAs after heat-shock in Col-0 wild type (A) and *upf1-5* mutant (B). The *upf1-5* mutant lacks an essential component of NMD machinery. Transcript accumulation was measured by qRT-PCR relative to the expression of *EF1a*. The data are the same as the data used to show the relative accumulation of *HSFA2-II* RNA in Fig 6. The data are the mean of three replicates. Bars=  $\pm$  SD.

(C, D) Similar experiment to that in (A) and (B), except plants were infiltrated with AZC.

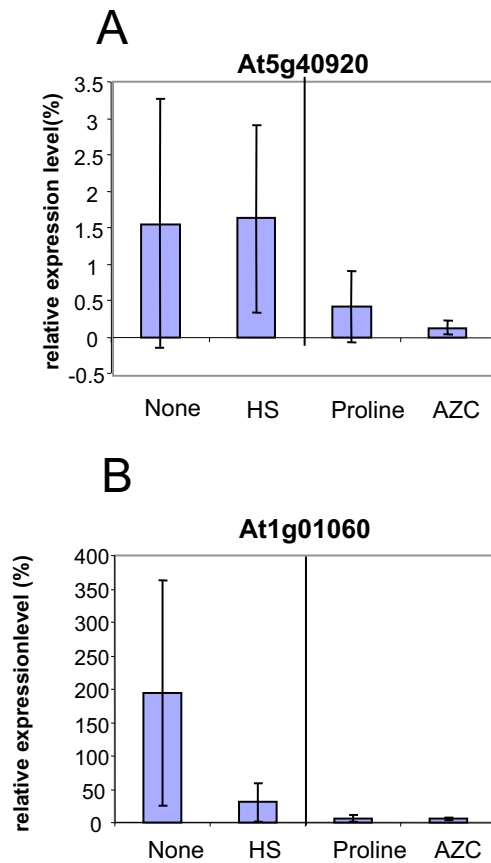

**Supplemental Figure 7. The accumulation of NMD target RNAs were not generically influenced by heat-shock or AZC treatment**

(A) The accumulation of RNA from the pseudogene *At5g40920* was measured 1 h after heat-shock and 3 h after infiltration of AZC. Transcript accumulation was measured by qRT-PCR relative to the accumulation of *EF1a* RNA. The data are the mean of three replicates. Bars =  $\pm$  SD. There was no statistical difference between the samples.

(B) Similar experiment to that in (A) except accumulation of RNA from the pseudogene *At1g01060* was measured. There was no statistical difference between the samples.

No clear trend was observed in the expression levels of two pseudogenes after heat-shock and AZC treatment.

**Supplemental Table 1 List of the genes up-regulated by CPR.**

| Array element                    | Log2(Fold Change) |        |        | WGeneName                                                               | WAccNum   |
|----------------------------------|-------------------|--------|--------|-------------------------------------------------------------------------|-----------|
|                                  | AZC               | HS     | Tun    |                                                                         |           |
| <b>Protein folding</b>           |                   |        |        |                                                                         |           |
| 250351_at                        | 6.353             | 8.339  | -0.681 | 17.7 kDa class II HS protein 17.6A (HSP17.7-CII)                        | AT5G12030 |
| 248657_at                        | 5.95              | 7.2857 | -1.071 | peptidyl-prolyl cis-trans isomerase                                     | AT5G48570 |
| 262307_at                        | 5.899             | 8.2432 | -1.13  | DNAJ HS N-terminal domain-containing protein                            | AT1G71000 |
| 248434_at                        | 5.731             | 8.3537 | -1.354 | 23.5 kDa mitochondrial small HS protein (HSP23.5-M)                     | AT5G51440 |
| 260248_at                        | 5.51              | 8.1854 | -0.997 | HS protein 101 (HSP101)                                                 | AT1G74310 |
| 263374_at                        | 5.271             | 6.6641 | -0.732 | DNAJ HS family protein                                                  | AT2G20560 |
| 266294_at                        | 5.159             | 7.1345 | -0.806 | 17.6 kDa class I small HS protein (HSP17.6B-CI)                         | AT2G29500 |
| 252515_at                        | 5.142             | 8.3814 | -0.404 | 17.4 kDa class I HS protein (HSP17.4-CI)                                | AT3G46230 |
| 256245_at                        | 4.772             | 6.613  | -1.636 | Hsp70A                                                                  | AT3G12580 |
| 260978_at                        | 4.717             | 9.3093 | -0.55  | 17.6 kDa class I small HS protein (HSP17.6C-CI)                         | AT1G53540 |
| 258336_at                        | 4.602             | 6.3981 | -0.063 | stress-responsive protein                                               | AT3G16050 |
| 250296_at                        | 4.501             | 7.4787 | -0.464 | 17.6 kDa class II HS protein (HSP17.6-CII)                              | AT5G12020 |
| 256518_at                        | 4.489             | 5.709  | -0.998 | expressed protein                                                       | AT1G66080 |
| 254059_at                        | 4.472             | 8.4883 | -0.653 | 23.6 kDa mitochondrial small HS protein (HSP23.6-M)                     | AT4G25200 |
| 248332_at                        | 4.266             | 5.9204 | -1.309 | AtHSP90.1.                                                              | AT5G52640 |
| 263150_at                        | 4.262             | 4.7848 | -0.74  | 17.4 kDa class III HS protein (HSP17.4-CIII)                            | AT1G54050 |
| 254839_at                        | 4.203             | 8.8066 | -0.584 | stress-inducible protein, putative                                      | AT4G12400 |
| 249575_at                        | 3.705             | 8.0845 | -0.054 | 15.7 kDa class I-related small HS protein-like (HSP15.7-CI)             | AT5G37670 |
| 250994_at                        | 2.778             | 2.9872 | -0.78  | Hsc70-2                                                                 | AT5G02490 |
| 265675_at                        | 2.607             | 7.1931 | -0.097 | Hsc70-1                                                                 | AT2G32120 |
| 256983_at                        | 2.283             | 4.9584 | -0.639 | chaperonin, putative                                                    | AT3G13470 |
| 256999_at                        | 2.132             | 2.372  | -0.386 | DNAJ HS N-terminal domain-containing protein                            | AT3G14200 |
| 253778_at                        | 1.583             | 2.4194 | -0.244 | DNAJ HS family protein                                                  | AT4G28480 |
| 261655_at                        | 1.613             | 4.2709 | -0.105 | peptidyl-prolyl cis-trans isomerase cyclophilin-type family protein     | AT1G01940 |
| <b>Transcription/translation</b> |                   |        |        |                                                                         |           |
| 266841_at                        | 5.998             | 7.1184 | -2.074 | HsfA2                                                                   | AT2G26150 |
| 252081_at                        | 5.368             | 7.6477 | -0.48  | HsfA7a                                                                  | AT3G51910 |
| 258133_at                        | 4.707             | 5.5459 | -0.823 | multi-protein bridging factor 1, conserved transcriptional coactivator. | AT3G24500 |
| 250304_at                        | 4.358             | 4.8165 | -0.126 | elongation factor 1B alpha-subunit 1 (eEF1Balpha1)                      | AT5G12110 |
| 250781_at                        | 3.613             | 5.7006 | -0.144 | DREB2A                                                                  | AT5G05410 |
| 267026_at                        | 3.413             | 4.3261 | 0.017  | a member of the DREB subfamily A-2                                      | AT2G38340 |
| 261081_at                        | 2.949             | 5.043  | -0.705 | transformer serine/arginine-rich ribonucleoprotein, putative            | AT1G07350 |



|                            |       |        |        |                                                               |           |
|----------------------------|-------|--------|--------|---------------------------------------------------------------|-----------|
| 247509_at                  | 2.68  | 2.0825 | -0.433 | HSFB2A                                                        | AT5G62020 |
| 254878_at                  | 2.635 | 4.2306 | -0.398 | HSFB2B                                                        | AT4G11660 |
| 246981_at                  | 2.408 | 2.9631 | -0.071 | bZIP protein                                                  | AT5G04840 |
| 246214_at                  | 2.348 | 3.7324 | -0.42  | HSFB1                                                         | AT4G36990 |
| 264255_at                  | 2.069 | 3.6136 | 0.1286 | SF2/ASF-like splicing modulator (SRP30)                       | AT1G09140 |
| 262548_at                  | 1.999 | 1.8639 | -0.362 | An Argonaute gene                                             | AT1G31280 |
| 259649_at                  | 1.982 | 2.5115 | -0.075 | TATA-binding protein-associated factor TAFII55 family protein | AT1G55300 |
| 250424_at                  | 1.974 | 3.2877 | 0.9483 | DNA-binding bromodomain-containing protein                    | AT5G10550 |
| 251793_at                  | 1.945 | 2.9583 | 0.4054 | regulator of chromosome condensation (RCC1) family protein    | AT3G55580 |
| 259666_at                  | 1.815 | 3.5904 | -0.155 | SC35-like splicing factor, 33 kD (SCL33)                      | AT1G55310 |
| 266715_at                  | 1.699 | 1.0004 | 0.2144 | RNA recognition motif (RRM)-containing protein                | AT2G46780 |
| 253249_at                  | 1.668 | 1.9142 | -0.1   | GATA transcription factor 3                                   | AT4G34680 |
| 261663_at                  | 1.575 | 4.6071 | -0.632 | myb family transcription factor                               | AT1G18330 |
| 260468_at                  | 1.798 | 1.5905 | -0.234 | SNF2 domain-containing protein                                | AT1G11100 |
| 261564_at                  | 1.538 | 2.0024 | 0.7574 | no apical meristem (NAM) family protein                       | AT1G01720 |
|                            |       |        |        |                                                               |           |
| <b>Protein degradation</b> |       |        |        |                                                               |           |
|                            |       |        |        |                                                               |           |
| 261265_at                  | 3.323 | 4.2637 | -0.911 | zinc finger (C3HC4-type RING finger) family protein           | AT1G26800 |
| 262656_at                  | 3.316 | 2.9735 | -1.014 | zinc finger (C3HC4-type RING finger) family protein           | AT1G14200 |
| 248040_at                  | 2.693 | 1.997  | -0.342 | zinc finger (C3HC4-type RING finger) family protein           | AT5G55970 |
| 265077_at                  | 2.477 | 3.2041 | -0.338 | zinc finger (C3HC4-type RING finger) family protein           | AT1G55530 |
| 264465_at                  | 2.383 | 2.4537 | -0.328 | E3 ubiquitin ligase SCF complex subunit SKP1/ASK1 (At18)      | AT1G10230 |
| 264758_at                  | 1.801 | 2.3901 | 0.4547 | F-box family protein                                          | AT1G61340 |
| 250036_at                  | 1.729 | 5.6886 | -0.02  | U-box domain-containing protein                               | AT5G18340 |
| 257748_at                  | 1.705 | 1.1005 | 0.3439 | U-box domain-containing protein                               | AT3G18710 |
| 245828_at                  | 1.575 | 1.3529 | -0.406 | zinc finger (C3HC4-type RING finger) family protein           | AT1G57820 |
| 247125_at                  | 1.53  | 1.5384 | -0.346 | zinc finger (C3HC4-type RING finger) family protein           | AT5G66070 |

**Supplemental Table 2 Validation of selected gene's expression by qRT-PCR.**

| AGI number / gene name                                                       |             | log <sub>2</sub> (FC) |               |               |
|------------------------------------------------------------------------------|-------------|-----------------------|---------------|---------------|
|                                                                              |             | Heat shock            | AZC           | Tunicamycin   |
| At1g10230<br>SKP1/ASK1                                                       | Replicate 1 | 4.4527                | 2.1027        | 0.5147        |
|                                                                              | Replicate 2 | 2.4807                | 2.3017        | 0.7477        |
|                                                                              | Replicate 3 | 2.3358                | 2.1833        | 0.2135        |
|                                                                              | p-value     | <b>0.0228</b>         | <b>0.0003</b> | <b>0.0431</b> |
| At5g66070<br>zinc finger (C3HC4-type RING finger)<br>family protein          | Replicate 1 | 2.4553                | 1.3558        | 0.6783        |
|                                                                              | Replicate 2 | 1.9522                | 2.2533        | 0.6067        |
|                                                                              | Replicate 3 | 1.8287                | 0.8018        | -0.7828       |
|                                                                              | p-value     | <b>0.0042</b>         | <b>0.0368</b> | 0.3792        |
| At1g26800<br>zinc finger (C3HC4-type RING finger)<br>family protein          | Replicate 1 | 6.4757                | 3.0843        | -0.2750       |
|                                                                              | Replicate 2 | 3.9540                | 3.6727        | 0.3120        |
|                                                                              | Replicate 3 | 5.5190                | 3.6483        | -0.6595       |
|                                                                              | p-value     | <b>0.0093</b>         | <b>0.0015</b> | 0.7305        |
| At1g14200<br>zinc finger (C3HC4-type RING finger)<br>family protein          | Replicate 1 | 5.7810                | 4.1443        | -1.5913       |
|                                                                              | Replicate 2 | 4.2325                | 3.9800        | -0.1997       |
|                                                                              | Replicate 3 | 4.3037                | 4.2147        | -1.2383       |
|                                                                              | p-value     | <b>0.0055</b>         | <b>0.0001</b> | 0.9316        |
| At1g55530<br>zinc finger (C3HC4-type RING finger)<br>family protein          | Replicate 1 | 5.5077                | 3.3430        | -0.3723       |
|                                                                              | Replicate 2 | 4.8818                | 2.0833        | 0.4240        |
|                                                                              | Replicate 3 | 4.5188                | 2.0997        | -0.4210       |
|                                                                              | p-value     | <b>0.0017</b>         | <b>0.0133</b> | 0.6514        |
| At5g04840<br>bZIP protein                                                    | Replicate 1 | 6.8277                | 4.0638        | 0.8600        |
|                                                                              | Replicate 2 | 5.4743                | 3.4560        | 0.4650        |
|                                                                              | Replicate 3 | 5.4063                | 3.0130        | 0.0580        |
|                                                                              | p-value     | <b>0.0030</b>         | <b>0.0037</b> | 0.0924        |
| At1g11100<br>SNF2 domain-containing protein                                  | Replicate 1 | 3.0420                | 4.0097        | -0.0253       |
|                                                                              | Replicate 2 | 4.3707                | 2.8303        | 0.6660        |
|                                                                              | Replicate 3 | 1.1897                | 2.0603        | -1.2200       |
|                                                                              | p-value     | <b>0.0449</b>         | <b>0.0173</b> | 0.6203        |
| At1g09140<br>SF2/ASF-like splicing modulator (SRP30)                         | Replicate 1 | 5.1927                | 3.3607        | 1.3083        |
|                                                                              | Replicate 2 | 5.2823                | 1.8280        | 0.5665        |
|                                                                              | Replicate 3 | 4.1763                | 2.3760        | 0.1040        |
|                                                                              | p-value     | <b>0.0026</b>         | <b>0.0151</b> | 0.1004        |
| At1g55310<br>SC35-like splicing factor, 33 kD (SCL33)                        | Replicate 1 | 4.4338                | 1.6637        | 0.8370        |
|                                                                              | Replicate 2 | 5.4192                | 1.4917        | 1.3812        |
|                                                                              | Replicate 3 | 3.9757                | 0.6913        | -0.6797       |
|                                                                              | p-value     | <b>0.0042</b>         | <b>0.0252</b> | 0.2465        |
| At1g07350<br>transformer serine/arginine-rich<br>ribonucleoprotein, putative | Replicate 1 | 6.9460                | 4.2900        | 0.6587        |
|                                                                              | Replicate 2 | 6.7397                | 2.6297        | 0.5482        |
|                                                                              | Replicate 3 | 5.6807                | 2.0610        | -1.9650       |
|                                                                              | p-value     | <b>0.0018</b>         | <b>0.0232</b> | 0.6021        |
| At5g62020<br>HSFB2A                                                          | Replicate 1 | 3.9107                | 3.6507        | -0.6540       |
|                                                                              | Replicate 2 | 1.7153                | 3.7423        | 0.2123        |
|                                                                              | Replicate 3 | 2.0720                | 3.5600        | -1.3123       |
|                                                                              | p-value     | <b>0.0318</b>         | <b>0.0001</b> | 0.8418        |

|                                                                                           |             |               |               |         |
|-------------------------------------------------------------------------------------------|-------------|---------------|---------------|---------|
| At2g38340<br>a member of the DREB subfamily A-2 of<br>ERF/AP2 transcription factor family | Replicate 1 | 5.1270        | 2.5740        | 0.2197  |
|                                                                                           | Replicate 2 | 5.4787        | 3.8757        | 0.0082  |
|                                                                                           | Replicate 3 | 3.8450        | 3.3290        | -0.0790 |
|                                                                                           | p-value     | <b>0.0052</b> | <b>0.0066</b> | 0.3161  |
| At5g05410<br>DREB2A                                                                       | rep1        | 7.9750        | 4.8930        | -0.3457 |
|                                                                                           | rep2        | 4.6360        | 3.7282        | -0.9575 |
|                                                                                           | rep3        | 6.6103        | 5.7670        | -1.7787 |
|                                                                                           | p-value     | <b>0.0111</b> | <b>0.0074</b> | 0.9341  |

**Supplemental Table 3 HSE representation in genes up-regulated by both HS and AZC.**

| 1000 bp upstream of start codon | Total number of the gene | HSE  |            |         |          |
|---------------------------------|--------------------------|------|------------|---------|----------|
|                                 |                          | gene | percentage | Z score | p-value  |
| HS-only upregulated genes       | 785                      | 35   | 4.46       | 6.15    | 3.87E-10 |
| HS-AZC upregulated genes        | 153                      | 23*  | 15.03      | 12.86   | 3.78E-38 |
| Genome                          | 33282                    | 553  | 1.66       |         |          |

\* 38% of these genes encode transcription factors. These are: -

At2g26150 *HSFA2*

At3g51910 *HSFA7a*

At4g11660 *HSFB2b*

At5g62020 *HSFB2a*

At1g18330 *Early phytochrome responsive-1, EPR1, MYB-TF.*

At5g04410 *NAC family hypothetical TF*

At5g05410 *DREB2, DREB2a*

**Supplemental Table 4 Primers used for this study.**

| Primers used for (q)RT-PCR               |               |                                  |
|------------------------------------------|---------------|----------------------------------|
| EF1a                                     | EF1aF*        | TGAGCACGCTCTTCTTGCTTTCA          |
|                                          | EF1aR         | GGTGGTGGCATCCATCTTGTTACA         |
| HSP70                                    | HSP70ARTF     | CTCTGTTTGCTTGAGATTCTAGTTGG       |
|                                          | HSP70ARTR     | ATGCCCAGTCGTCTTTCATAGGTC         |
| HSP70B                                   | HSP70BRTF     | GCGTGTTTAGTGTTAAGACGAA           |
|                                          | HSP70BRTR     | CTCGAAACAACGAAACAGCTGAA          |
| Bip3                                     | Bip3RTF       | GAGTGGTTAGAAGAGAATGTGAATG        |
|                                          | Bip3RTR       | CAAAATCCTATAGCTAACCGACTC         |
| HsfA2II                                  | HsfA2-AZCF    | TTATTCGTCAGCTCAATACTTATATGGGTTTC |
|                                          | HsfA2-exonR   | CACATGACATCCAGATCCTTGC           |
| HsfA2                                    | HsfA2-HSF     | TCGTCAGCTCAATACTTATGGATTC        |
|                                          | HsfA2-exonR   | CACATGACATCCAGATCCTTGC           |
| HsfA3                                    | HsfA3F        | CTGCAGAAACAACAAGTGATG            |
|                                          | HsfA3R        | TAGTTCACCCGATAAGAAACG            |
| HsfA7a                                   | HsfA7aF       | GAGTCAGCAAAGAGGAAAAGAGG          |
|                                          | HsfA7aR       | CCATCTAGTTAGGAGGTGGAAG           |
| TuMV                                     | TuMV-RTF      | GATCCACCACCGTCACCACAG            |
|                                          | TuMV-RTR      | CTTAGCAAGGGACCCTGCTCCAC          |
| TCV                                      | TCVP28-RTF    | CCAGGGATCTGGGCTAGTAGTAGTG        |
|                                          | TCVP28-RTR    | CCTCTTCCGTTCCCTACCAACCTATC       |
| at1g01060<br>(Arciga-Reyes et al., 2006) | qRTat1g01060F | ACAGGATGATTACCGTTCGTTTC          |
|                                          | qRTat1g01060R | CAATGGCAGTTATACTTGGAGGAG         |
| at5g40920                                | qRTat5g40920F | GCTGGAGAACACTCTCTAAACTGG         |
|                                          | qRTat5g40920R | TGCCAATCATCTTCACATCATCACACTC     |

\*F = forward primer; R = Reverse primer

**Supplemental Table 4 continued**

| Primers used for qRT-PCR to validate the microarray data |               |                              |
|----------------------------------------------------------|---------------|------------------------------|
| At1g10230                                                | At1g10230RTF  | TCGAGTACGCGAAGATGCAC         |
|                                                          | At1g10230RTR  | ATGTAATCAGCAACCGTCTGG        |
| At5g66070                                                | At5g66070RTF  | CCACCTACCATGCATCGACAA        |
|                                                          | At5g66070RTR  | CAATGATTGGTGCATCAAATCTG      |
| At1g26800                                                | At1g26800RTF  | GAAACAGTGATGGTGTGAGTCCG      |
|                                                          | At1g26800RTR  | GAGGATTATGGAGATTCTGAGC       |
| At1g14200                                                | At1g14200RTF  | CGTGTCTATGTGTAGGTATGAG       |
|                                                          | At1g14200RTR  | AAACCTAGCCCCATGTTGCATC       |
| At1g55530                                                | At1g55530RTF  | TTAGCACCTTGTTCTCCTCGTCG      |
|                                                          | At1g55530RTR  | ATGTAGCATTCAACCAAATCTGAGA    |
| At5g04840                                                | At5g04840RTF  | TAGGCATGTTGCAGACGGTGGAAG     |
|                                                          | At5g04840RTR  | TGGCTATTCTCCAGGGACAGTGTT     |
| At1g11100                                                | At1g11100RTF  | GAAGAGAAAGATGGTGGCTTCTGC     |
|                                                          | At1g11100RTR  | GTTTGTGAGAAGAGCTTCAATTGG     |
| At1g09140                                                | At1g09140RTF  | CAAGATCGAATTCTCCAGTTTCACC    |
|                                                          | At1g09140RTR  | GGAGCCTGAGAAGCTTGAGACG       |
| At1g55310                                                | At1g55310RTF2 | GCTTGACTCAATGAGGGGAAGGAGC    |
|                                                          | At1g55310RTR2 | GCAATCATGGCGTAGATTGCGAACC    |
| At1g07350                                                | At1g07350RTF  | CGTAGCATATCCCCAAGGAAG        |
|                                                          | At1g07350RTR  | TGTTATGGGCTGACGGATCT         |
| At5g62020                                                | At5g62020RTF  | GGACGAGAAGTGAAGGTGTTC        |
|                                                          | At5g62020RTR  | GACACGTGCTCTGCTTGTC          |
| At2g38340                                                | At2g38340RTF  | TCAGAGGAAGGTTACAGCTATG       |
|                                                          | At2g38340RTR  | GATGCAGCATAAATCCTAAGCTAG     |
| At5g05410                                                | At5g05410RTF  | GAACAGTGTTGCCAACGGTTCATAC    |
|                                                          | At5g05410RTR  | CAAATCCAAAAAGCTTCATATTG      |
| At2g15130                                                | At2g15130RTF  | GGTGGTGATAGGTGGGATCAGGGTTACG |
|                                                          | At2g15130RTR  | GTTGGCCTTGACTCTCTCCAGAGTTG   |

### Supplemental Table 4 continued

| Primers used for promoter::GUS constructs      |                |                                              |
|------------------------------------------------|----------------|----------------------------------------------|
| HSP70A                                         | FA6            | ACCCGCCATGGTTAGAGATCAG                       |
| 337bp pro                                      | FA27           | TAAAGGTACCATTGGGTGATGAAATAAC                 |
| HSP70B                                         | FA8            | GATTTTCGTCGCCATGGTTGCTA                      |
| 340bp pro                                      | FA35           | TAATGGTACCCTTACTGTTGGCCTTTTATTC              |
| Primers used for site directed mutagenesis     |                |                                              |
| AtoB                                           | AtoBF*         | CTTTACTCGTGAACCTCTCTTGTAAGCTCTTTGCCGA<br>CC  |
|                                                | AtoBR          | GGTCGGCAAAGAGCTTACAAGAGAGTTCACGAGTAA<br>AG   |
| AKO                                            | AKOF           | CTTTACTCGTTAACGTTCTCTAAAGCTCTTTGCCGA<br>CC   |
|                                                | AKOR           | GGTCGGCAAAGAGCTTTAGAGAACGTTAACGAGTAA<br>AG   |
| BtoA                                           | BtoAF          | GGTGAATCCAGAACGTTCTCGAACGTTTGCGCGATT<br>TCTC |
|                                                | BtoAR          | GAGAAATCGCGCAAACGTTGAGAACGTTCTGGATT<br>CACC  |
| BKO                                            | BKOF           | GGTGAATCCATAACTCTCTTTTACGTTTGCGCGATT<br>TCTC |
|                                                | BKOR           | GAGAAATCGCGCAAACGTAAAAGAGAGTTATGGATT<br>CACC |
| Primers used for cloning of Heat shock factors |                |                                              |
| HsfA2                                          | attB1HsfA2FLF  | AAAAAGCAGGCTCCACCATGGAAGAAGTAAAGTGG<br>AAATG |
|                                                | attB2HsfA2FLR  | AGAAAGCTGGTgTTAAGGTTCCGAACCAAG               |
| HsfA2 truncated                                | attB2HsfA2DNR  | AGAAAGCTGGGtTtCACTCCATAGTCCCCAAGCTTG         |
| HsfA7a                                         | attB1HsfA7aFLF | AAAAAGCAGGCTCCACCATGATGAACCCGTTTCTCC         |
|                                                | attB2HsfA7aFLR | AGAAAGCTGGGtTTAGGAGGTGGAAGCCAAACTC           |

\* F= Forward primer; R=Reverse primer
